# Supplementary material for: Loading-dependent structures of CO2 in the flexible molecular van der Waals host p-tert-butylcalix[4]arene with 1 : 1 and 2 : 1 guest–host stoichiometries
Source: Royal Society of Chemistry journal article supplement (doi:10.1039/b802035c), 2008-01-01
Supplement: b802035c.pdf [file b802035c.pdf]

**Supplementary Materials.**

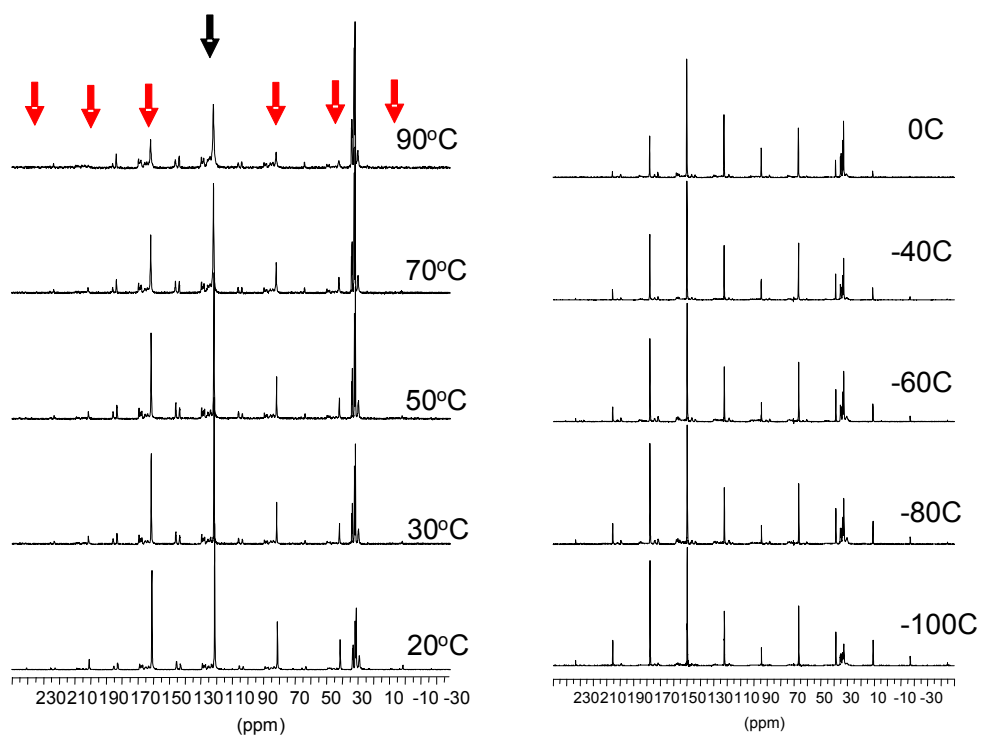

Fig. S1. Variable temperature  $^{13}\text{C}$  CP MAS spectra of a low occupancy  $\text{CO}_2$ -tBC sample with the  $\text{CO}_2$ /tBC ratio of 0.82. Black arrow indicates the isotropic signal of  $\text{CO}_2$  and the red arrows are for the spinning sidebands.

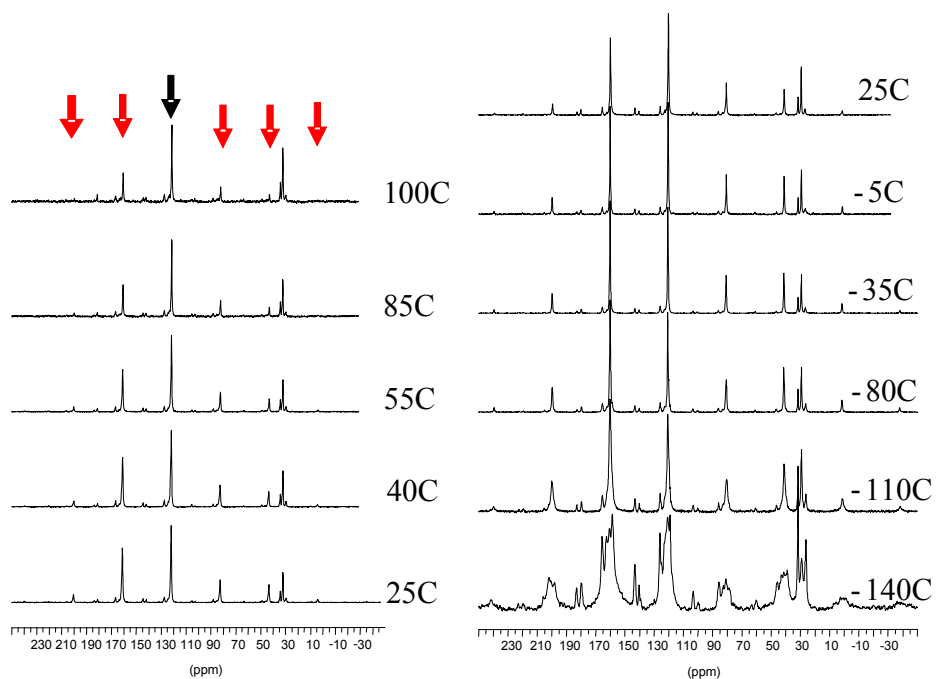

Fig. S2. Variable temperature  $^{13}\text{C}$  CP MAS spectra of a high occupancy  $\text{CO}_2$ -tBC sample with the  $\text{CO}_2/\text{tBC}$  ratio of 1.8. Black arrow indicates the isotropic signal of  $\text{CO}_2$  and the red arrows are for the spinning sidebands.

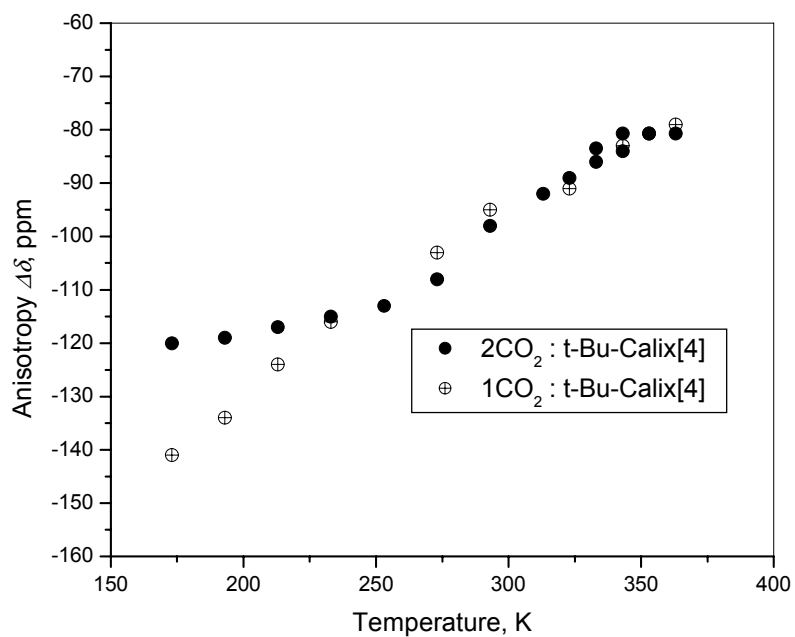

Fig. S3. Variation of the  $^{13}\text{C}$  chemical shift anisotropy with the temperature for  $\text{CO}_2$  in a low occupancy  $\text{CO}_2$ -tBC sample with the  $\text{CO}_2$ /tBC ratio of 0.82 (open circles with a cross) and a high occupancy sample with the  $\text{CO}_2$ /tBC ratio of 1.8 (solid circles). All the anisotropy values were obtained from the spinning sidebands analysis.
